# Supplementary material
Source: publisher figshare collection journal article supplement (https://future-science-group.figshare.com/ndownloader/files/34015064)

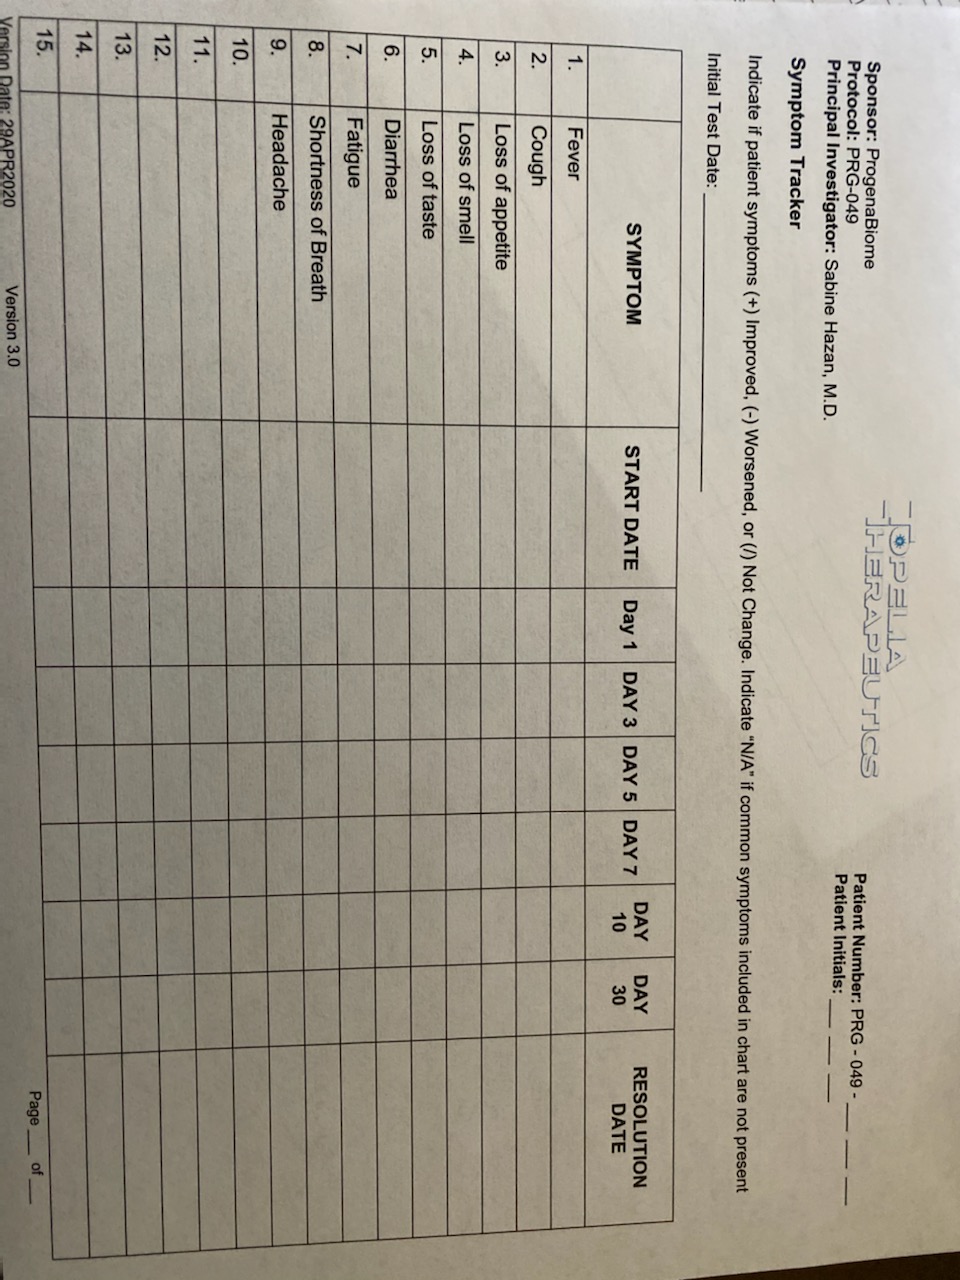

Supplement: Supplementary file 1 [file 34015064]
